# Supplementary material
Source: PubMed Central journal article supplement (PMC4311849)
Supplement: pnas.201423645SI.pdf [file pnas.201423645SI.pdf]

# Supporting Information

Gaborit et al. 10.1073/pnas.1423645112

## SI Materials and Methods

**Cell Lines.** The human pancreatic carcinoma (BXPC3), ovarian carcinoma (OVCAR-5), breast cancer (T47D, SKBR-3, and MCF-7), gastric cancer (NCI-N87), head and neck cancer (CAL-27), and lung cancer lines (A549, NCI-H1935, NCI-H322M) were from ATCC. The NIH/3T3-R1, -R2, -R2R3, -R3, -R1R4, and BXPC3-Luc cells were provided by C. Larbouret (Institut de Recherche en Cancérologie de Montpellier, INSERM-U896). Ovarian and lung cancer cells were cultured in RPMI 1640 medium. Other cells were cultured in DMEM. Media were supplemented as recommended by ATCC, usually with 10% (vol/vol) FCS (Life Technologies).

**Abs and Reagents.** Abs XC252 and XC90 were generated in our laboratory (1). Trastuzumab was from Genentech Inc. For Western blotting, anti-HER3, anti-AKT and anti-ERK were from Santa Cruz Biotechnology; anti-pAKT and -pHER3 Abs were from Cell Signaling Technology. Abs against pERK were provided by Rony Seger (Weizmann Institute). The secondary Abs used for isotyping were purchased from SouthernBiotech. NRG labeled with the d2 dye was provided by CisBio. Unless indicated, all other materials were from Sigma. The mouse polyclonal IgG used as control was from MP Biomedicals.

**Production of IgB3.** To produce IgB3 (a recombinant HER3's extracellular domain fused to a human IgG Fc domain), the cDNA sequence was derived from the already-made plasmid pCDM7-IgB3 (1). We cloned the IgB3 cDNA sequence into the pENTR/D-TOPO vector, before processing to recombination into the pLenti6/V5-DEST vector (Invitrogen), following the vendor's recommendation. The stop codon was maintained to avoid the V5-Tag. HEK-293FT cells were cotransfected by using Jet-PEI (Polyplus) with the pLenti6-IgB3 vector and the ViraPowerTM Packaging Mix (Invitrogen). After 3 d of production, the supernatant containing the lentiviral particles was used to infect HEK-293 cells. A stable cell line was established out of the infected cells by further selection with Blasticidine (10  $\mu$ g/mL). The HEK-293/IgB3 cells were maintained in DMEM-1% FCS for 6 d at 32 °C. The supernatant was then loaded on an Agarose-Protein G column (2 mL). After intensive washes with PBS, the IgB3 protein was eluted from the column with 0.1 M glycine buffer (pH 2.7). The more concentrated fractions were pooled and dialyzed for 24 h against PBS.

**Flow Cytometry.** NIH/3T3-R2R3 cells were treated with trypsin and washed twice in PBS containing BSA (weight/vol). The cells were then incubated for 1 h at 4 °C with the mAbs directed to EGFR, HER2, HER3, or HER4 (10  $\mu$ g/mL). After two washes, the cells were incubated for 1 h at 1 °C with an anti-mouse Ab

coupled to Alexa Fluor 488. The capacity of the anti-HER mAbs to bind with the indicated HER protein at the cell surface was correlated with the fluorescence intensity measured by using the LSRII flow cytometer.

**Competition Assays.** NG33 and XC252 were labeled with Lumi4 Tb cryptate (K2) and NRG with the d2 dye. Ab competition assays were performed in 96-well black plates coated with IgB3 (1.5  $\mu$ g/mL). After blocking with PBS/BSA, plates were incubated for 1 h with various concentrations of competitors under gentle shaking at room temperature. The labeled mAb, NG33-K2 or XC252-K2, was then added at 1 nM final concentration. After 1 h of incubation, the plate was washed four times by using KREBS buffer (146 mM NaCl, 4 mM KCl, 0.5 mM MgCl<sub>2</sub>, 1 mM CaCl<sub>2</sub>, 10 mM Hepes, 1 g/L glucose, and 1 mg/mL BSA, pH 7.4), and the fluorescent intensity (excitation, 340 nm; emission, 610 nm) was measured by using a Pherastar FS reader. NRG competition assays were performed by using NIH/3T3-R2R3 cells plated in 96-well black plates (50,000 cells per well) and incubated for 24 h in full medium. After overnight serum starvation, the cells were washed with KREBS buffer (100  $\mu$ L) and incubated with increasing concentrations of competitors for 45 min at 4 °C. After the addition of NRG-d2 (10 nM), the cells were incubated for an additional 45 min at 4 °C. Finally, after two washes with KREBS buffer, the fluorescence intensity was measured at 670 nm (excitation: 620 nm).

**Cell Proliferation Assays.** Cells were plated on 96-well plates (5,000 cells per well) in triplicates. After 1 d, the cells were treated as indicated in starvation medium supplemented with NRG (1 or 10 ng/mL). After 3 d, the MTT reagent was added to the cells, and 1 h later, the formazan crystals were dissolved in SDS/dimethylformamide solution for 30 min. Absorbance was measured at 570 nm.

**Migration Assays.** OVCAR-5 cells ( $1 \times 10^6$ ) were seeded in the upper compartment of migration chambers (Transwell; Corning). The lower compartment was filled with medium supplemented with NRG (10 ng/mL) in the absence or presence of mAb NG33 (10  $\mu$ g/mL). After 24 h, cells that reached the lower side of the filter were fixed, permeabilized with Triton X-100 (0.1%), and stained with a Giemsa solution. Images were quantified by using ImageJ.

**Data and Statistical Analysis.** FACS data were analyzed by using the FlowJo software. The other data were represented by using the Prism GraphPad software, and statistical analysis was performed by using this same software.

1. Chen X, et al. (1996) An immunological approach reveals biological differences between the two NDF/heregulin receptors, ErbB-3 and ErbB-4. *J Biol Chem* 271(13):7620-7629.

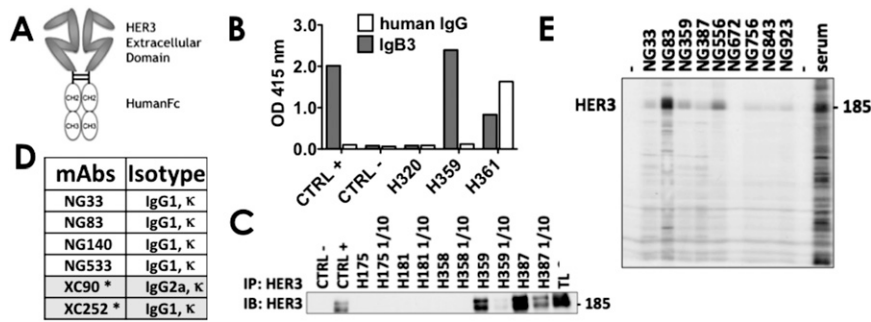

**Fig. S1.** Hybridoma screening and mAb isotyping. (A) Mice were immunized with recombinant IgB3. (B) The hybridoma supernatant screening using ELISA was performed on a 96-well plate coated with IgB3 (1 μg/mL) or with a human IgG. The plates were blocked with PBS-1% BSA and incubated for 1 h with hybridoma supernatants, followed by a second incubation for 1 h with HRP-labeled anti-mouse IgG and subsequently detected by 2,2'-azino-bis(3-ethylbenzothiazoline-6-sulfonic acid) addition. The OD at 415 nm was then measured by using an ELISA microplate reader. (C) The second step of the screening was performed by immunoprecipitation (IP). Anti-mouse IgG beads were incubated first with the hybridoma supernatant and subsequently with total cell lysate from HER3-expressing T47D cells. (D) The mAbs directed to HER3 were isotyped by using ELISA. The 96-well plates were coated with IgB3 (1 μg/mL) and, after blocking, incubated with the indicated mAbs for 1 h. After washing, the plates were incubated for 1 h with various secondary HRP-coupled Abs able to bind specifically, IgG1, IgG2a, IgG2b, IgG3, IgM, IgA, Kappa chain, or Lambda chain. The detection was performed as shown in B. (E) Finally, the ability of the mAbs to detect HER3, used as primary Ab in a Western blot experiment, was determined on cell lysate from T47D cells.

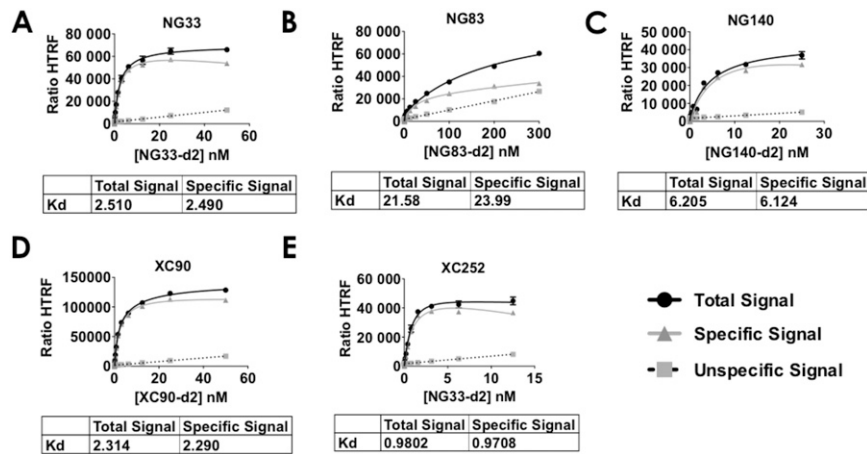

**Fig. S2.**  $K_d$  determination of mAb to HER3 using the Tag-Lite technology (A–C) of the newly generated mAbs and (D and E) of the previously generated mAbs. Cells are transfected with HER3–SNAP-Tag and labeled withBG-Lumi4(Tb), a SNAP-tag substrate. After incubation with increasing concentrations of indicated d2-labeled mAb directed to HER3, the  $K_d$  was determined from the binding curve fitting. The binding curve was obtained by measuring the TR-FRET between the donor Lumi4(Tb) and the acceptor d2-dye ( $n = 3$ ). The unspecific binding was evaluated by adding an excess of unlabeled Ab.
